# Supplementary material for: Constructing an ultra-adsorbent based on the porous organic molecules of noria for the highly efficient adsorption of cationic dyes
Source: Royal Society of Chemistry journal article supplement (doi:10.1039/c9ra08490h), 2020-01-01
Supplement: c9ra08490h1.pdf [file c9ra08490h1.pdf]

## Supporting Information

### **Constructing an ultra-absorbent based on porous organic molecule norita for highly efficient adsorption of cationic dyes**

Danyong Jiang,<sup>a</sup> Ruiping Deng,<sup>c</sup> Gang Li,<sup>a</sup> Guoli Zheng\*<sup>a</sup> and Huadong Guo\*<sup>b</sup>

*<sup>a</sup>Key Laboratory of Catalysis and Energy Materials Chemistry of Ministry of Education & Hubei Key Laboratory of Catalysis and Materials Science, South-Central University for Nationalities, Wuhan 430074, China. E-mail: zhengguoli2002@aliyun.com*

*<sup>b</sup>Department of Chemistry, Changchun Normal University, Changchun, 130032, P. R. China. E-mail: hdxmguo@163.com,*

*Fax: +86-431-86168210; Tel: +86-431-86168210*

*<sup>c</sup>Changchun Institute of Applied Chemistry, Chinese Academy of Sciences 5625 Renmin Street, Changchun, 130022, China*

## Adsorption equilibrium

Table S1. Langmuir isotherm model and the Freundlich isotherm model parameters for MB, RhB and NR adsorptions on Noria-POP-1.

| Dye | Langmuir model        |        | Freundlich model |        |
|-----|-----------------------|--------|------------------|--------|
|     | $K_L$                 | $R^2$  | $K_F$            | $R^2$  |
| MB  | $3.47 \times 10^{-6}$ | 0.9999 | 963.5265         | 0.8339 |
| RhB | $1.20 \times 10^{-5}$ | 0.9981 | 94.0324          | 0.8498 |
| NR  | $1.10 \times 10^{-4}$ | 0.9984 | 180.6606         | 0.6094 |

To reveal the adsorption isotherm mechanism. Langmuir and Freundlich eqs were applied to describe adsorption equilibria.

Langmuir equation:

$$\frac{C_e}{Q_e} = \frac{C_e}{Q_m} + \frac{1}{K_L Q_m} \quad (1)$$

Freundlich equation:

$$\ln Q_e = \ln K_F + \frac{1}{n} \ln C_e \quad (2)$$

where  $Q_e$  and  $C_e$  are defined to be the same as above;  $K_F$  ( $L \cdot mg^{-1}$ ) is the Freundlich constant; and  $n$  is the heterogeneity factor.

## Adsorption kinetics

Table S2. Adsorption kinetic model parameters for MB, RhB and NR adsorption on Noria-POP-1

| Dye | $Q_e(\text{mg g}^{-1})$ | Pseudo-first-order      |        | Pseudo-second-order                      |        |
|-----|-------------------------|-------------------------|--------|------------------------------------------|--------|
|     |                         | $K_1 (\text{min}^{-1})$ | $R^2$  | $K_2 (\text{g mg}^{-1} \text{min}^{-1})$ | $R^2$  |
| MB  | 2434                    | 0.983                   | 0.9131 | 0.1679                                   | 0.9992 |
| RhB | 855                     | 1.005                   | 0.9566 | 0.0006                                   | 0.9990 |
| NR  | 590                     | 1.062                   | 0.9562 | 0.0035                                   | 0.9960 |

The kinetics of MB, NR, and RhB adsorption on Noria-POP-1 were explored using the pseudo-first-order eq 3 and the pseudo-second-order eq 4.

the pseudo-first-order eq 3

$$\frac{1}{Q_t} = \frac{K_1}{Q_e t} + \frac{1}{Q_e} \quad (3)$$

the pseudo-second-order eq 4

$$\frac{t}{Q_t} = \frac{1}{K_2 Q_e^2} + \frac{t}{Q_e} \quad (4)$$

where  $Q_e$  ( $\text{mg}\cdot\text{g}^{-1}$ ) is the adsorption capacity at equilibrium and  $Q_t$  ( $\text{mg}\cdot\text{g}^{-1}$ ) is the adsorption capacity at time  $t$  (min).  $K_1$  ( $\text{g}\cdot\text{mg}^{-1}\cdot\text{min}^{-1}$ ) is the rate constant of the pseudo-first-order model, and  $K_2$  ( $\text{g}\cdot\text{mg}^{-1}\cdot\text{min}^{-1}$ ) is the rate constant of the pseudo-second-order model.

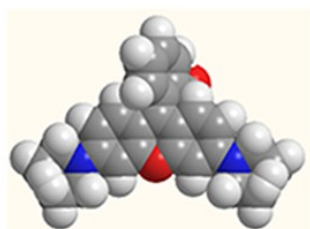

Rhodamine B (RhB) <sup>12</sup>

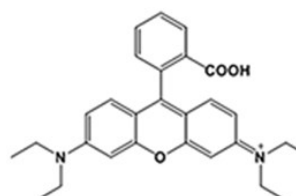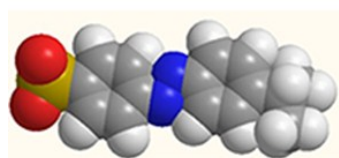

Methyl Orange (MO) <sup>12</sup>

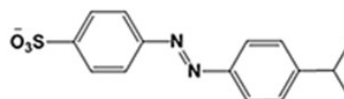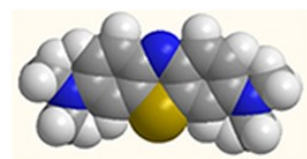

Methylene Blue (MB) <sup>12</sup>

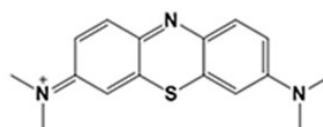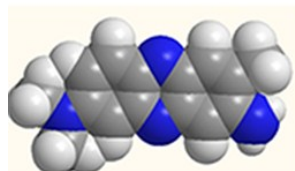

Neutral Red (NR) <sup>12</sup>

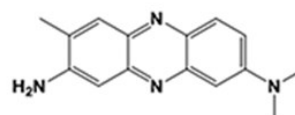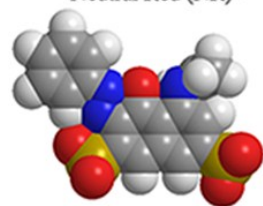

Acid Red 1 (AR 1) <sup>12</sup>

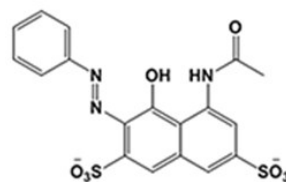

Fig. S1. Molecular structures of MO, AR1, MB, RhB and NR.

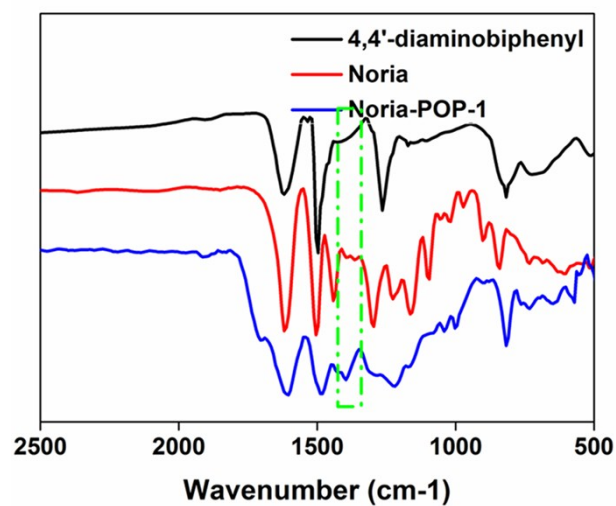

Fig. S2. Fourier transform infrared spectra (FT-IR) of Noria-POP-1; Noria; 4,4'-diaminobiphenyl.

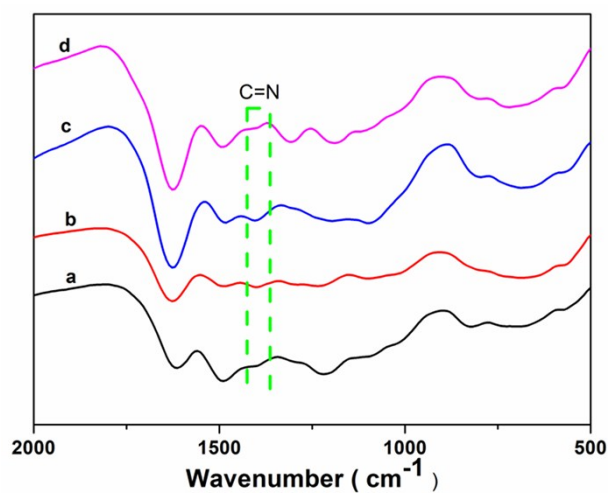

Fig. S3. Fourier transform infrared spectra (FT-IR) of Noria-POP-1(a); MB@Noria-POP-1(b); RhB@ Noria-POP-1(c); NR@ Noria-POP-1(d)

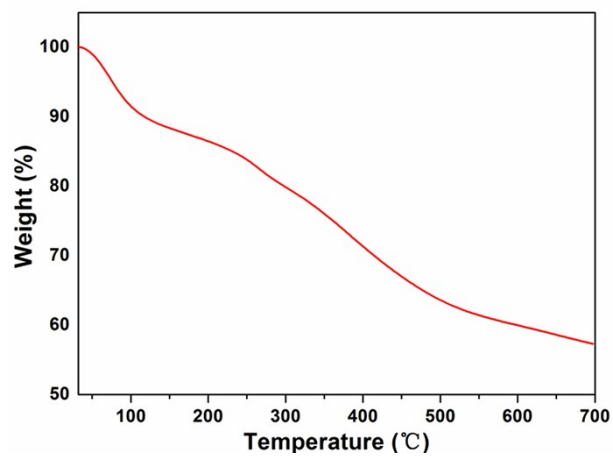

Fig. S4. Thermogravimetric analysis of Noria-POP-1.

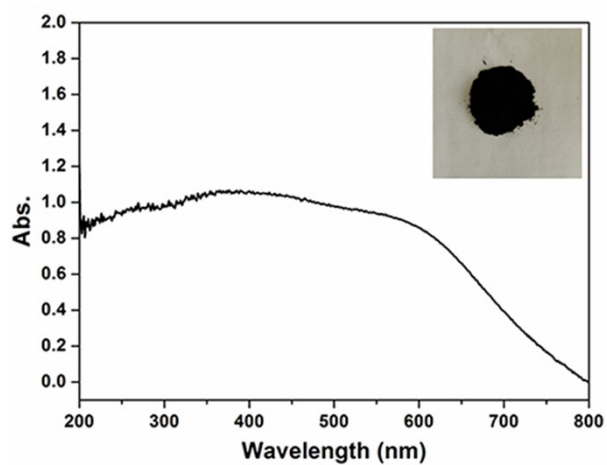

Fig. S5. Ultraviolet absorption spectrum for Noria-POP-1.

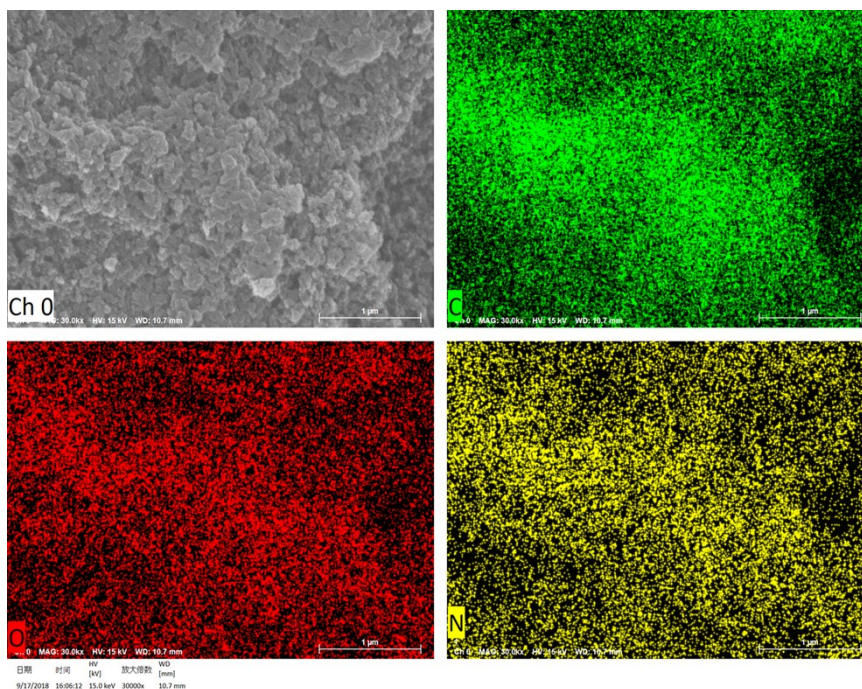

Fig. S6. SEM and EDX images of Noria-POP-1.

Table. S3. Energy dispersive X-ray (EDX) analysis of Noria-POP-1.

| Element | Wt %   | At %   |
|---------|--------|--------|
| C       | 66.515 | 72.111 |
| N       | 5.496  | 5.109  |
| O       | 27.990 | 22.780 |

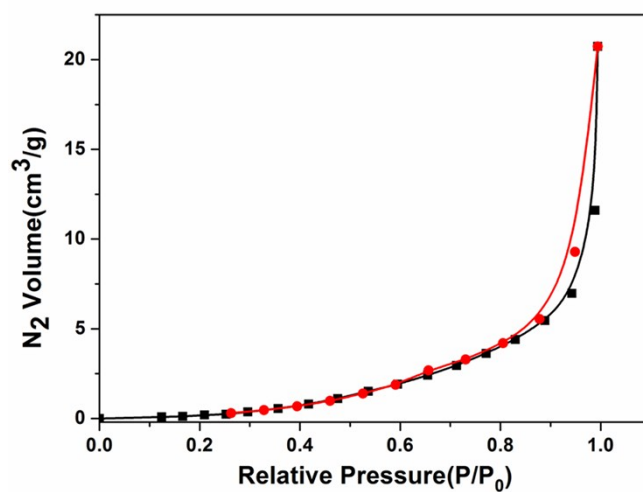

| Material    | SBET (m <sup>2</sup> /g) | Pore volume (cm <sup>3</sup> /g) | Pore size (nm) |
|-------------|--------------------------|----------------------------------|----------------|
| Noria-POP-1 | 1.8                      | 0.032                            | 70.314         |

Fig. S7. N<sub>2</sub> adsorption-desorption isotherms for Noria-POP-1.

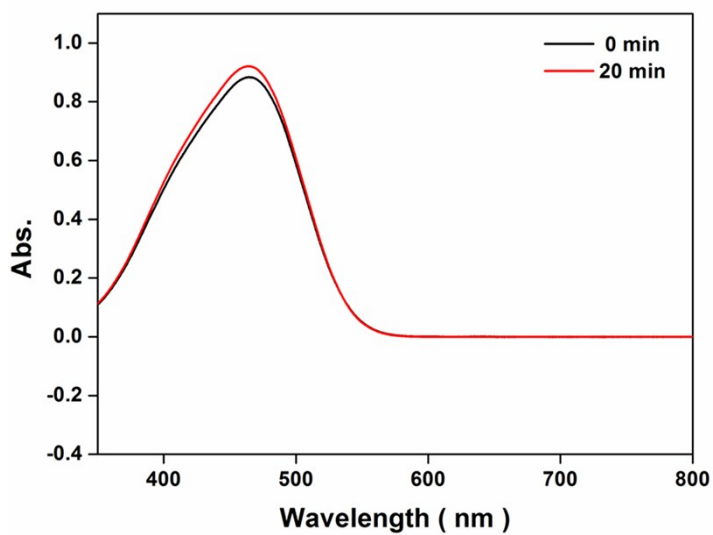



Fig. S8. UV-vis spectra of MO with Noria-POP-1 at given intervals

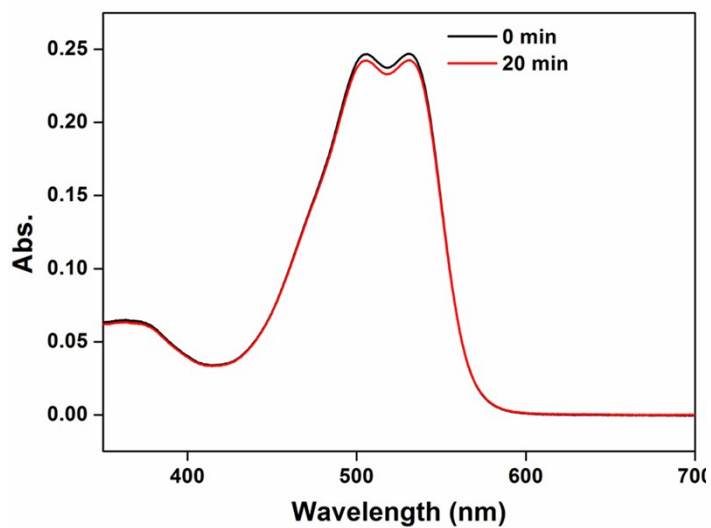

Fig. S9. UV-vis spectra of AR1 with Noria-POP-1 at given intervals

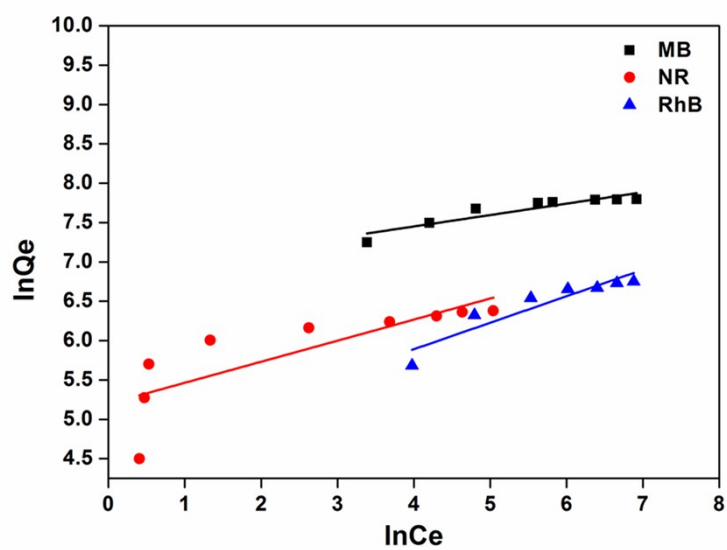

Fig. S10. Freundlich isotherm models of MB, RhB, and NR on Noria-POP-1.

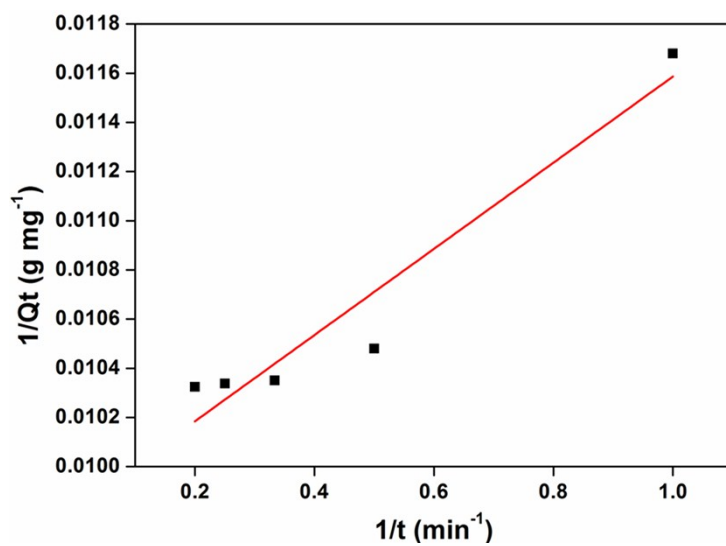

Fig. S11. The pseudo-first-order model of Noria-POP-1 for MB.

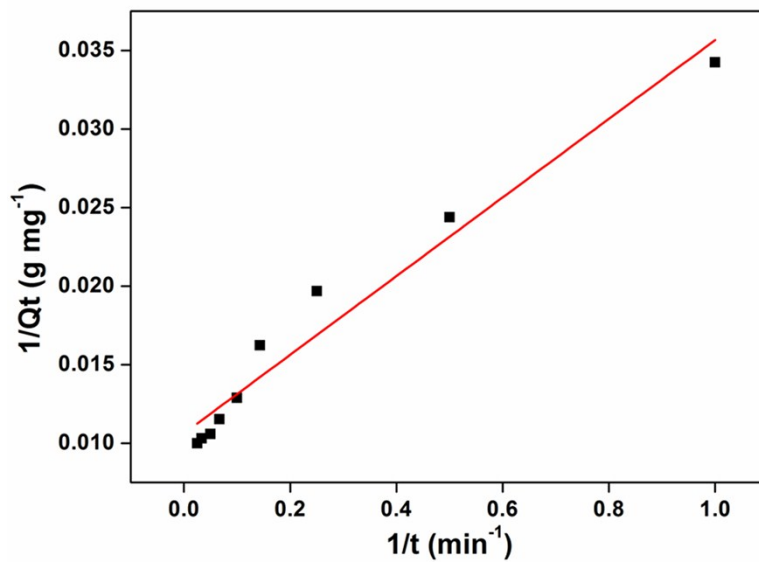

Fig. S12. The pseudo-first-order model of Noria-POP-1 for NR.

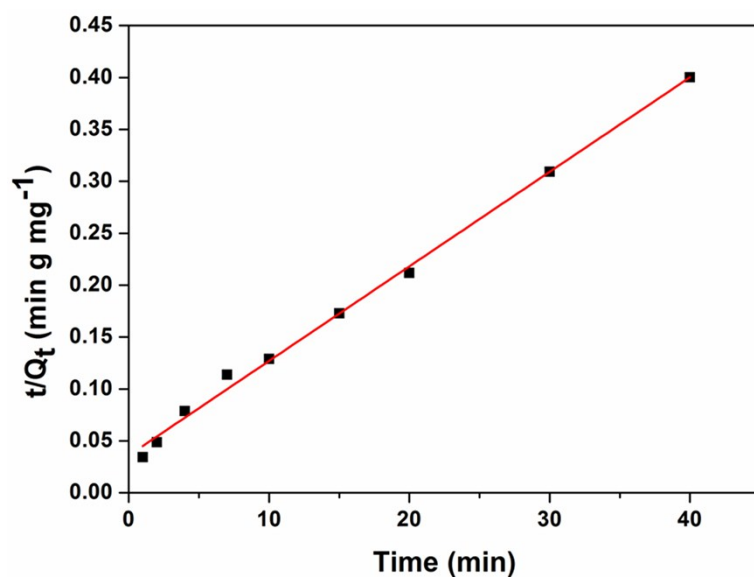

Fig. S13. The pseudo-second-order model of Noria-POP-1 for NR.

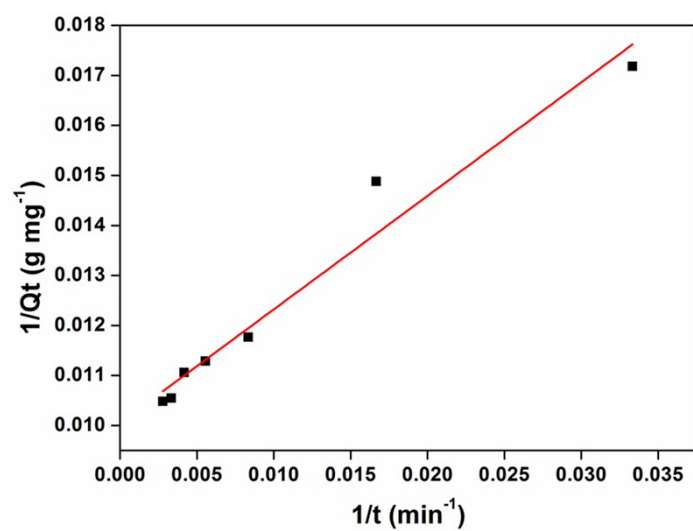

Fig. S14. The pseudo-first-order model of Noria-POP-1 for RhB.

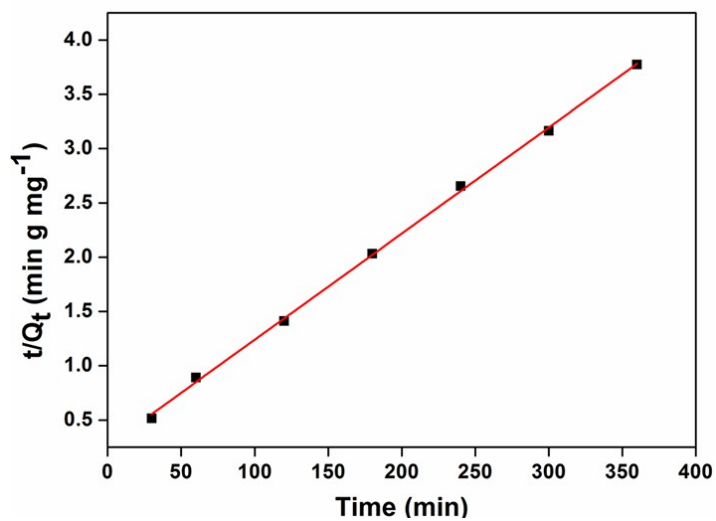

Fig. S15. The pseudo-second-order model of Noria-POP-1 for RhB.

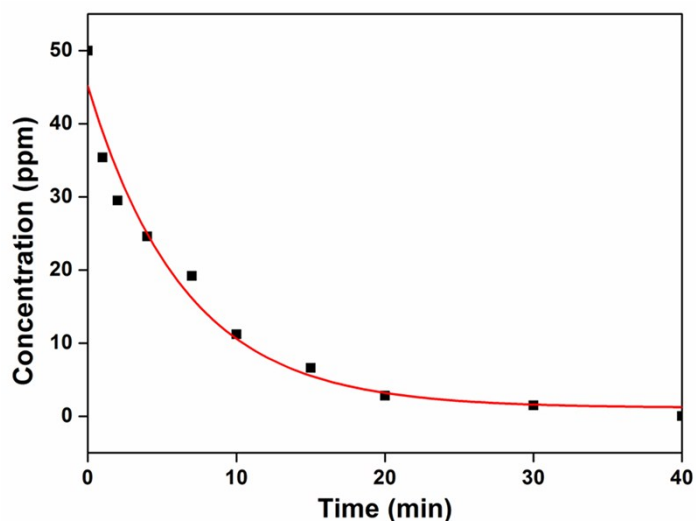

Fig. S16. The effect of contact time on the removal of NR.

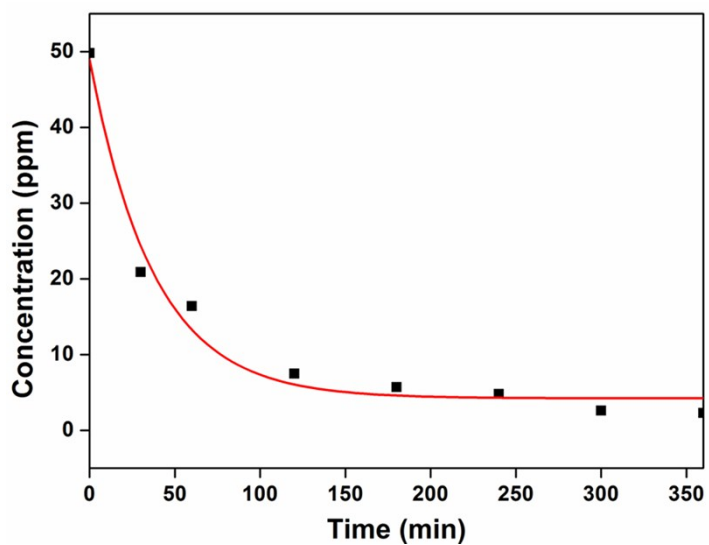

Fig. S17. The effect of contact time on the removal of RhB.

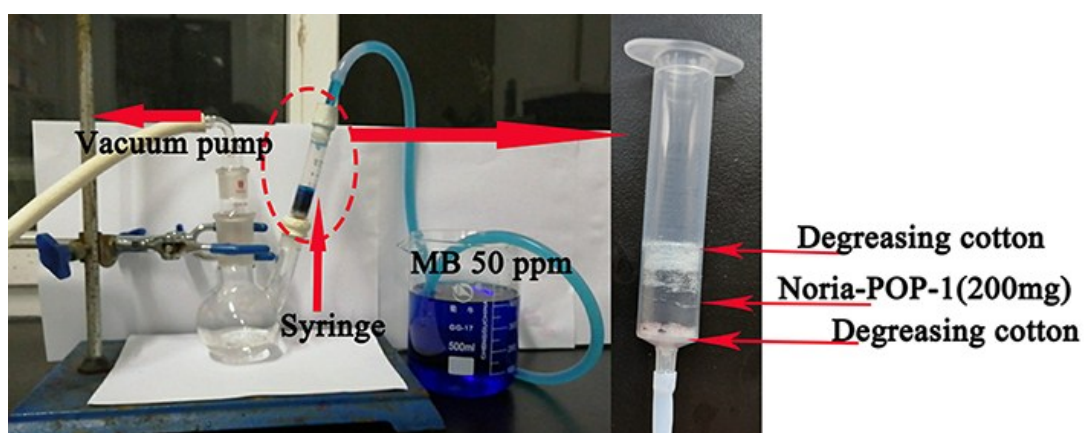

Fig. S18. The adsorption device for MB.

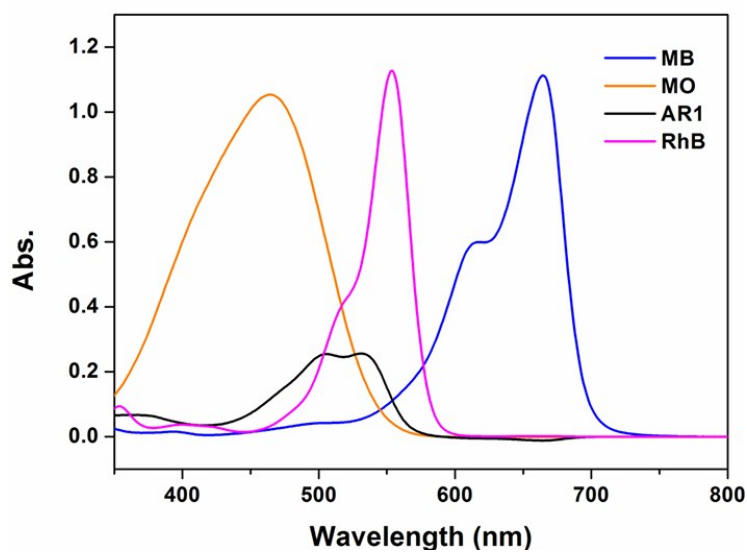

Fig. S19. UV-vis spectra of MO, MB, RhB and AR1.

Table. S4 Comparison of MB adsorption capacity for adsorbents.

| Adsorbents                                                                                   | $q_{\max}$ (mg g <sup>-1</sup> ) of MB | Ref. |
|----------------------------------------------------------------------------------------------|----------------------------------------|------|
| MOP-2                                                                                        | 1153                                   | 1    |
| TS-COF-1                                                                                     | 1691                                   | 2    |
| BOPs                                                                                         | 3250                                   | 3    |
| CaO/g-C <sub>3</sub> N <sub>4</sub>                                                          | 1915.8                                 | 4    |
| [Ca(HDCPP) <sub>2</sub> (H <sub>2</sub> O) <sub>2</sub> ] <sub>n</sub> (DMF) <sub>1.5n</sub> | 952                                    | 5    |
| ZJU-24                                                                                       | 902                                    | 6    |

|                              |      |            |
|------------------------------|------|------------|
| Porous Carbon sheets         | 769  | 7          |
| NH <sub>2</sub> -MIL-101(Al) | 762  | 8          |
| Noria-POP-1                  | 2434 | This works |

---

## References

- [1] Huang, L.; He, M.; Chen, B.; Cheng, Q.; Hu, B. Facile Green Synthesis of Magnetic Porous Organic Polymers for Rapid Removal and Separation of Methylene Blue, *ACS Sustainable Chem. Eng.*, 2017, 5, 4050–4055. <https://doi.org/10.1021/acssuschemeng.7b00031>.
- [2] Zhu, X.; An, S.; Liu, Y.; Hu, J.; Liu, H.; Tian, C.; Dai, S.; Yang, X.; Wang, H.; Abney, C.W. Efficient Removal of Organic Dye Pollutants Using Covalent Organic Frameworks, *AIChE J.*, 2017, 63, 3470–3478. DOI: 10.1002/aic.15699.
- [3] Zhao, X.; Wang, D.; Xiang, C.; Zhang, F.; Liu, L.; Zhou, X. and Zhang, H. Facile Synthesis of Boron Organic Polymers for Efficient Removal and Separation of Methylene Blue, Rhodamine B, and Rhodamine 6G, *ACS Sustainable Chem. Eng.*, 2018, 6, 16777-16787. <https://doi.org/10.1021/acssuschemeng.8b04049>.
- [4] Younis, S. A.; Abd-Elaziz, A.; Hashem, A. I. Utilization of a pyrrole derivative based antimicrobial functionality impregnated onto CaO/g-C<sub>3</sub>N<sub>4</sub> for dyes adsorption, *RSC Adv.*, 2016, 6, 89367–89379. <https://doi.org/10.1039/C6RA10143G>.
- [5] Hou, Y.; Sun, J.; Zhang, D.; Qi, D.; Jiang, J. Porphyrin–Alkaline Earth MOFs with the Highest Adsorption Capacity for Methylene Blue, *Chem. Eur. J.*, 2016, 22, 6345-6352. <https://doi.org/10.1002/chem.201600162>.

[6] Zhang, Q.; Yu, J.; Cai, J.; Song, R.; Cui, Y.; Yang, Y.; Chen, B. and Qian, G. A porous metal–organic framework with –COOH groups for highly efficient pollutant removal, *Chem. Commun.*, 2014, 50, 14455-14458. <https://doi.org/10.1039/C4CC06648K>.

[7] Gong, J.; Liu, J.; Chen, X.; Jiang, Z.; Wen, X. et al. Converting real-world mixed waste plastics into porous carbon nanosheets with excellent performance in the adsorption of an organic dye from wastewater, *J. Mater. Chem. A*, 2015, 3, 341-351. <https://doi.org/10.1039/C4TA05118A>.

[8] Haque, E.; Lo, V.; Minett, A. I.; Harris, A. T.; Church, T. L. Dichotomous adsorption behaviour of dyes on an amino-functionalised metal–organic framework, amino-MIL-101(Al), *J. Mater. Chem.A* , 2014, 2, 193–203. <https://doi.org/10.1039/C3TA13589F>.
